# Supplementary material
Source: PubMed Central journal article supplement (PMC9501784)
Supplement: jamaoncol-e224109-s001.pdf [file jamaoncol-e224109-s001.pdf]

## Supplemental Online Content

Strohbehn GW, Holleman R, Burns J, et al. Adoption of extended-interval dosing of single-agent pembrolizumab and effectiveness as time-to-discontinuation compared with standard dosing. *JAMA Oncol*. Published online September 22, 2022. doi:10.1001/jamaoncol.2022.4109

### eMethods

**eFigure 1.** Flow of records through study

**eFigure 2.** Derivation of the cohorts used in comparative effectiveness analysis

**eTable 1.** Inclusionary and exclusionary ICD-9 and -10 codes for the NSCLC cohort

**eTable 2.** Time-to-treatment discontinuation of standard- and extended-interval pembrolizumab in the All Diseases cohort

**eTable 3.** Time-to-treatment discontinuation of standard- and extended-interval pembrolizumab in the All Diseases Cohort, by primary site of disease

**eTable 4.** Incident prescriptions for levothyroxine and prednisone in the All Diseases Cohort

**eTable 5.** Frequency of response assessment imaging ordering in the All Diseases Cohort

**eTable 6.** Time-to-treatment discontinuation of standard- and extended-interval pembrolizumab in the NSCLC cohort

**eTable 7.** Incident prescriptions for levothyroxine and prednisone in the NSCLC Cohort

**eTable 8.** Frequency of response assessment imaging ordering in the NSCLC Cohort

### eReferences

This supplemental material has been provided by the authors to give readers additional information about their work.

## eMethods

### Data Sources and Record Selection

We identified all instances of pembrolizumab administration in the VA between April 1, 2020 and August 24, 2021 using the VA Corporate Data Warehouse (CDW), an engine of patient-level VA electronic health record data (**eFigure 1**). We extracted pembrolizumab start and discontinuation dates, age, sex, ICD-9 and ICD-10 codes, and non-cancer Charlson comorbidity index (CCI) components.<sup>1</sup> Due to the classification of this study as non-research (by virtue of proceeding under a Memorandum of Understanding between the VA Center for Clinical Management and Research [Ann Arbor, MI] and the VA National Oncology Program [Durham, NC]), evaluation of individual electronic health records and physician notes was not pursued and certain elements were not extracted, specifically patient weight trajectory and albumin (two surrogates for performance and nutritional status/drug clearance) and date of death.

We sought to compare the efficacy of standard- and extended-interval pembrolizumab administered as a single-agent for two major reasons. First, administering pembrolizumab in combination with cytotoxic chemotherapy marginally constrains prescriber choice of pembrolizumab administration frequency because chemotherapy often requires administration at least every 3 or 4 weeks. Second, and related, comparing standard-interval against extended-interval pembrolizumab without excluding chemotherapy would enrich the standard-interval subpopulation for low or absent expression of programmed cell death ligand 1 (PD-L1) – a subpopulation with lower likelihood of long-term survival and therefore biasing *against* standard-interval. We therefore excluded records for which chemotherapies or targeted therapies *approved by the FDA for use in combination with pembrolizumab* were administered contemporaneously. Co-administration of the following drugs led to record exclusion: Carboplatin, cisplatin, etoposide, paclitaxel, nab-paclitaxel, pemetrexed, fluorouracil, axitinib, lenvatinib, and gemcitabine.

Rarely, pembrolizumab is administered at a weight-based dose (2 mg/kg) rather than conventional flat dosing (200 mg or 400 mg). Common reasons for weight-based dosing have been discussed previously.<sup>2</sup> We excluded records for which pembrolizumab dosing was neither 200 mg nor 400 mg to better assess the two FDA-approved flat-dosing options, extended- and standard-interval.

Due to the circumstances caused by the onset of the COVID-19 pandemic, the analysis of extended-interval pembrolizumab deviated from traditional norms. One weakness of extended-interval's FDA approval process was the use of a historical control in the KEYNOTE-555 cohort B trial. For the purposes of real-world comparative effectiveness, then, it was important to ensure that the two subpopulations were contemporaneous and that there had not been major changes to standard of care that could have been introduced during the study window. We therefore evaluated only those records for which incident single-agent pembrolizumab administration was begun after FDA approval of extended-interval dosing by excluding records that had received any pembrolizumab in the 100 days preceding April 1, 2020. To achieve sufficiently long follow-up, we excluded records for which incident pembrolizumab dose was after September 6, 2020. The remaining patients comprised the *First Dose Cohort – All Diseases* (**eFigure 1A**).

Another weakness of extended-interval's FDA approval process was the short follow-up period in the unplanned KEYNOTE-555 cohort B analysis: Subjects eligible for response assessment alone, rather than, for example, progression-free survival (PFS), were included in the analysis. Consequently, the unplanned analysis included n=44 out of an intended n=100 cohort size.<sup>3</sup> To provide longer-term follow-up more in line with conventional FDA standards, we excluded records in which the incident pembrolizumab was administered after September 6, 2020. That is, we sought longer-term data due to our chosen primary outcome measure for real-world comparative effectiveness analysis, time-to-treatment discontinuation (TTD), which estimates the lower bound of PFS.<sup>4</sup>

The remaining patients comprised the *All Diseases* cohort for comparative effectiveness analysis (**eFigure 2A**). Unlike a prospective, randomized, controlled trial, where an *a priori* decision to pool multiple tumor types may not be justifiable, there are a number of features of the current study and the informational milieu in which it occurs that make pooling into an *All Diseases* cohort justifiable and appropriate. First, the primary sites of disease are balanced between

the extended- and standard-interval subpopulations. Extended- and standard-interval are essentially pharmacokinetically and pharmacodynamically equivalent *across indications*. There are no meaningful within-dose pharmacokinetic differences in pembrolizumab *across indications*. Both extended- and standard-interval provide sufficient pembrolizumab to saturate target *across indications*. Finally, pembrolizumab's dose-response relationship is the same *across indications* (see full analysis in Canadian Agency for Drugs and Technology in Health, *CADTH Technology Review: Optimal Use 360 Report no. 25*, 2019; <https://www.cadth.ca/sites/default/files/ou-tr/ho0008-dosing-timing-immuno-oncology-drugs.pdf>).<sup>5</sup> More detailed analyses of each tumor types may be feasible in the future as the number of patients receiving extended-interval pembrolizumab increase.

Given the heterogeneity of treatment indication in the pembrolizumab recipient population – as well as the high likelihood that a randomized, controlled trial comprised of disparate diseases would be insufficient to achieve accelerated or full regulatory approval by FDA – we sought to compare the TTD of patients with non-small cell lung cancer (NSCLC), pembrolizumab's most common indication in VA. To isolate NSCLC patients, we excluded records that, in the 6 months prior to April 1, 2020, carried the diagnostic code(s) of cancer(s) other than NSCLC for which pembrolizumab is FDA-approved (**eTable 1**). We excluded small cell lung cancer by having excluded records with platinum and etoposide co-administration (chemotherapy exclusions as above). We also presume a degree of exclusion of *second-line* pembrolizumab due to the availability of second- and later-line small cell lung cancer treatments in VA (e.g., lurbinectedin, temozolomide, topotecan, etc.), and anecdotally high rates of utilization for the FDA-approved chemoimmunotherapy (anti-PD-L1) combinations in first-line small cell lung cancer treatment (e.g., platinum, etoposide, and either durvalumab or atezolizumab). The remaining patients – those whose *only* oncologic diagnostic code was lung cancer – comprised the *NSCLC Cohort* (**eFigure 2B**). Graphical representations of cohort derivation were generated using a publicly available web-based application.<sup>6</sup>

## Primary Outcome Measures

In describing extended-interval's adoption, we evaluated the number and proportion of pembrolizumab prescriptions that employed the extended-interval in a variety of clinical scenarios. First, we sought to describe extended-interval in terms of "market share", specifically what proportion of 1) *all* pembrolizumab prescriptions during a given time interval and 2) all *incident* pembrolizumab prescriptions during a given time interval was comprised of extended-interval prescriptions. Second, we sought to understand how different dose intervals were employed over time in the VA, specifically by evaluating 1) whether, after a certain amount of time, prescribers transition from standard- to extended-interval and 2) whether prescribers who *start* pembrolizumab using extended-interval dosing ever transition to standard-interval (out of concern for efficacy, convenience, etc.). Descriptive statistics were generated in Stata version 16.0 (StataCorp; College Station, TX).

To evaluate the real-world comparative effectiveness of extended- and standard-interval, we employ time-to-treatment discontinuation (TTD), a real-world outcome measure readily available from drug prescription records, defined as the time from incident prescription to the end date of the final or most recent prescription. In the case of pembrolizumab, the end date of the final prescription was t+21 days for standard-interval and t+42 days for extended-interval. In NSCLC, and particularly in NSCLC treated with immune checkpoint inhibitor in the context of a clinical trial, TTD is strongly correlated with both PFS and overall survival.<sup>4</sup> Reference 4 provides additional information in Table 3 (row 5, columns 9-11): For immune checkpoint inhibitors in NSCLC, TTD is strongly correlated with PFS ( $r = 0.85$ ), and the TTD-OS correlation ( $r=0.72$ ) appears *stronger* than that of PFS-OS ( $r=0.63$ ). TTD, in theory, captures drug discontinuations due to progression of disease, death, or intolerable adverse events, therefore estimating the lower bound of progression-free survival,<sup>4</sup> and insofar as prescribers initiate a therapy believing it to be efficacious and in the best interests of the patient, TTD is a pragmatic endpoint with a great degree of clinical relevance to the individual prescriber.

We perform our real-world comparative effectiveness analysis in a manner akin to intention-to-treat, by grouping patients according to the dosing interval associated with their first pembrolizumab dose. In real-world practice, for a patient to transition from standard- to extended-interval dosing in a shared decision-making context, he/she must have survived long enough and tolerated pembrolizumab well enough to merit broaching the transition topic. Therefore, excluding the subpopulation of patients who transition from standard- to extended-interval altogether would bias *against* the standard-interval group by removing patients who experience rapid progression, hyper-progression, or immune-related adverse events shortly after starting standard-interval dosing and, as a result, have short TTDs. Kaplan-Meier statistic and curves and Cox proportional hazards regression models of TTD for both *All Diseases* and *NSCLC* were generated in Stata version 16.0 (StataCorp; College Station, TX).

## Secondary Outcome Measures

### Assessing for Immune-Related Adverse Events (irAE)

It is important to assess whether extended-interval pembrolizumab confers an obviously higher rate of immune-related adverse events (irAE). Given data limitations with non-research operations activity and the inability to directly assess for irAE in our cohort, we chose to assess *new* prescriptions of the medications that would be used to treat irAE, focusing on levothyroxine for immune-mediated thyroiditis and prednisone for the multitude of other irAEs that require corticosteroid treatment (e.g., pneumonitis, dermatitis, myositis). First, we excluded patients in the cohort who had received prescriptions for either levothyroxine or prednisone in the 90 days prior to their first dose of pembrolizumab. 90 days was chosen to sufficiently *exclude* those patients who chronically require these medications while *not excluding* those patients who may have received corticosteroid at some point as a pre-medication. After applying these criteria, we interrogated the VA Corporate Data Warehouse (CDW) for incident medication prescriptions in our cohort using the following code in Stata:

#### *Levothyroxine*

```
select distinct b.NationalDrugSID,b.NationalFormularyName,c.DosageForm
into #drugsid
from cdwork.dim.DrugNameWithoutDose as a
join cdwork.dim.NationalDrug as b on a.DrugNameWithoutDoseSID=b.DrugNameWithoutDoseSID
join cdwork.dim.DosageForm as c on c.DosageFormSID=b.DosageFormSID
where DrugNameWithoutDose='levothyroxine';
```

#### *Prednisone*

```
select distinct b.NationalDrugSID,b.NationalFormularyName,c.DosageForm
into #drugsid
from cdwork.dim.DrugNameWithoutDose as a
join cdwork.dim.NationalDrug as b on a.DrugNameWithoutDoseSID=b.DrugNameWithoutDoseSID
join cdwork.dim.DosageForm as c on c.DosageFormSID=b.DosageFormSID
where DrugNameWithoutDose='prednisone';
```

### Assessing Frequency of Monitoring

It is important to assess whether patients receiving standard-interval pembrolizumab are *more likely* to receive response assessment imaging than patients receiving extended-interval pembrolizumab. For each patient in our cohorts, we therefore assessed the number of computed tomography (CT), magnetic resonance imaging (MRI), and positron-emission tomography (PET) studies ordered for each patient *after* the date of pembrolizumab initiation. We used the following Current Procedural Terminology codes to do this:

**CT:** 70460, 70470, 70490, 70491, 70492, 71250, 71260, 71270, 74150, 74160, 74170, 74176, 74177, 74178

**MRI:** 70551, 70552, 70553

**PET:** 78814, 78815, 78816

**eFigure 1. Flow of records through study.**

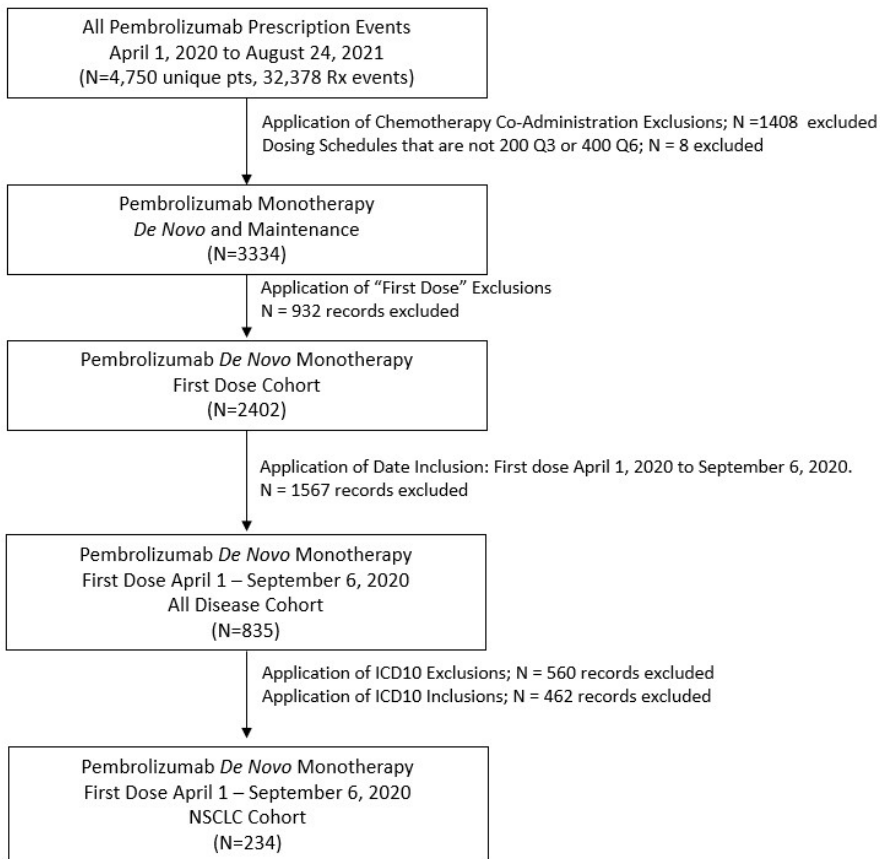

**eFigure 2. Derivation of the cohorts used in comparative effectiveness analysis.** (A) All diseases cohort and (B) NSCLC cohort. Note that prior pembrolizumab led to exclusion from both cohorts. Note that in NSCLC (B), records were excluded if any of the exclusionary diagnostic codes in **eTable 1** were found. Figures were generated using publicly available software.<sup>6</sup>

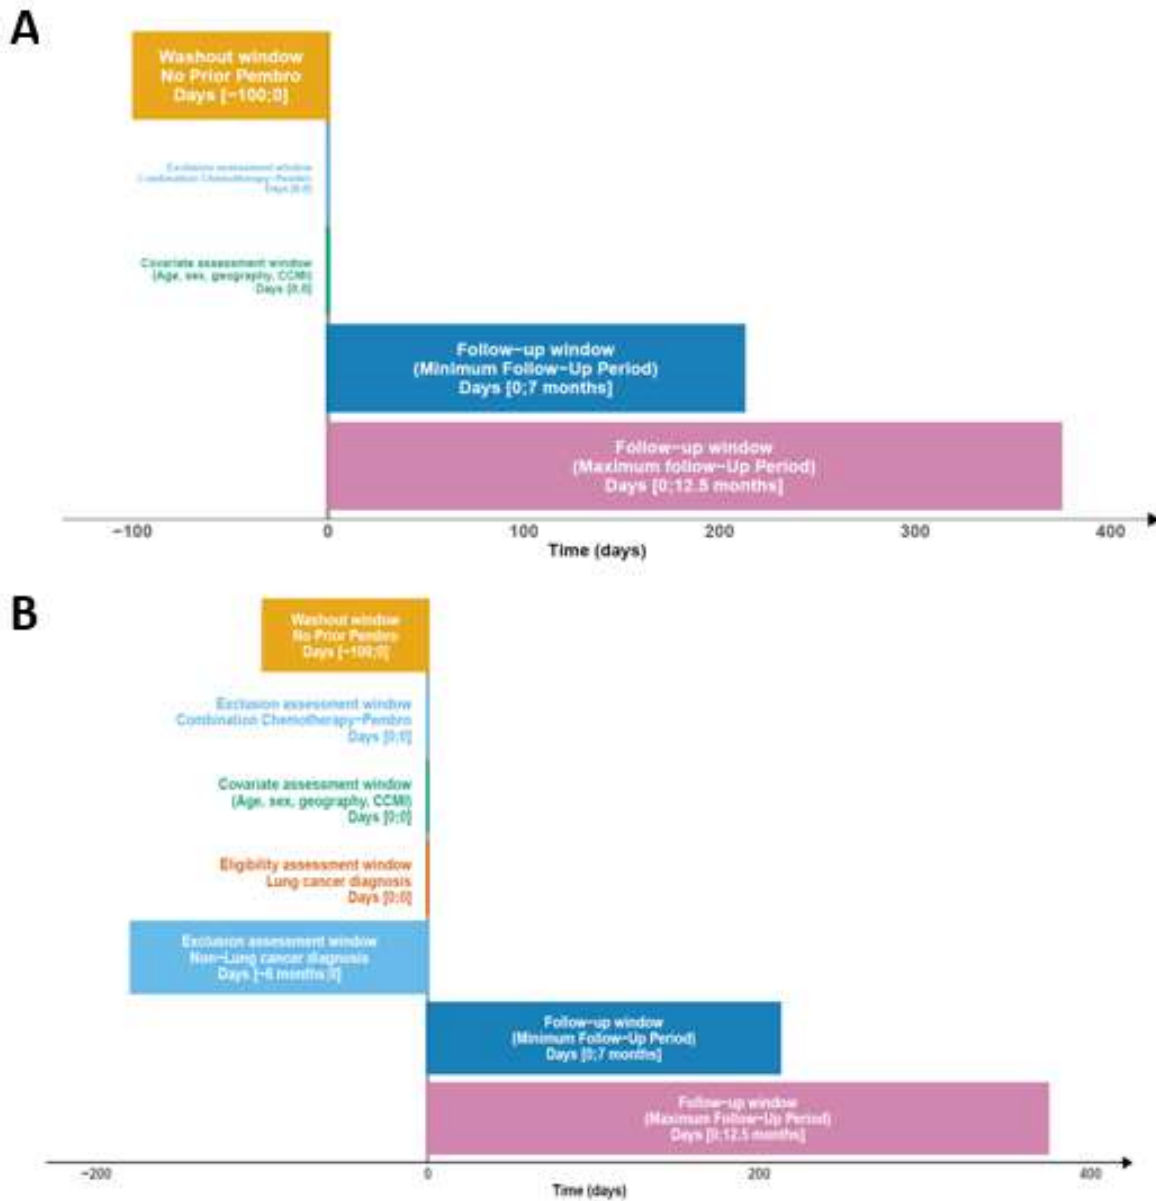

**eTable 1. Inclusionary and exclusionary ICD-9 and -10 codes for the NSCLC cohort.**

| <b>Inclusions</b> |                                                            |
|-------------------|------------------------------------------------------------|
| <b>ICD10 code</b> | <b>Diagnosis</b>                                           |
| C34.xx            | Lung cancer                                                |
| C39.xx            | Lung cancer                                                |
| <b>ICD9 code</b>  | <b>Diagnosis</b>                                           |
| 162.2             | Lung cancer                                                |
| 162.3             | Lung cancer                                                |
| 162.4             | Lung cancer                                                |
| 162.5             | Lung cancer                                                |
| 162.8             | Lung cancer                                                |
| 162.9             | Lung cancer                                                |
|                   |                                                            |
| <b>Exclusions</b> |                                                            |
| <b>ICD10 code</b> | <b>Diagnosis</b>                                           |
| C00.xx            | Head and neck cancer                                       |
| C01.xx            | Head and neck cancer                                       |
| C02.xx            | Head and neck cancer                                       |
| C03.xx            | Head and neck cancer                                       |
| C04.xx            | Head and neck cancer                                       |
| C05.xx            | Head and neck cancer                                       |
| C06.xx            | Head and neck cancer                                       |
| C07.xx            | Head and neck cancer                                       |
| C08.xx            | Head and neck cancer                                       |
| C09.xx            | Head and neck cancer                                       |
| C10.xx            | Head and neck cancer                                       |
| C11.xx            | Head and neck cancer                                       |
| C12.xx            | Head and neck cancer                                       |
| C13.xx            | Head and neck cancer                                       |
| C14.xx            | Head and neck cancer                                       |
| C15.xx            | Gastroesophageal cancer                                    |
| C16.xx            | Gastroesophageal cancer                                    |
| C18.xx            | Colorectal cancer                                          |
| C19.xx            | Colorectal cancer                                          |
| C20.xx            | Colorectal cancer                                          |
| C21.xx            | Colorectal cancer                                          |
| C22.xx            | Hepatocellular carcinoma                                   |
| C23.xx            | Gallbladder cancer                                         |
| C24.xx            | Biliary tract unspecified                                  |
| C30.xx            | Nasal cavity cancer                                        |
| C31.xx            | Accessory sinus cancer                                     |
| C32.xx            | Laryngeal cancer                                           |
| C37.xx            | Thymic carcinoma/thymoma                                   |
| C38.xx            | Heart/mediastinum/pleura neoplasm                          |
| C43.xx            | Melanoma                                                   |
| C44.xx            | Other cutaneous skin cancer                                |
| C50.xx            | Breast cancer                                              |
| C53.xx            | Cervical cancer                                            |
| C54.xx            | Endometrial carcinoma                                      |
| C55.xx            | Unspecified uterine cancer (possible miscoded endometrial) |



|        |                                                                  |
|--------|------------------------------------------------------------------|
| C57.xx | Unspecified female organ cancer                                  |
| C64.xx | Kidney cancer                                                    |
| C65.xx | Kidney cancer                                                    |
| C66.xx | Ureteral cancer (possibly urothelial)                            |
| C67.xx | Bladder cancer                                                   |
| C68.xx | Unspecified urinary organ cancer                                 |
| C81.xx | Hodgkin lymphoma                                                 |
| C83.xx | Non-follicular (large B-cell) lymphoma                           |
| C85.xx | Unspecified types of non-Hodgkin lymphoma                        |
| C88.xx | Malignant immunoproliferative disease and other B-cell lymphomas |
| C4A.9  | Merkel cell carcinoma                                            |

**eTable 2. Time-to-treatment discontinuation of standard- and extended-interval pembrolizumab in the All Diseases cohort.**

|                                                            | <b>Standard-Interval<br/>(N=534)</b> | <b>Standard-Interval →<br/>Extended-Interval<br/>(N=142)</b> | <b>Pooled<br/>Standard-Interval<br/>(N=676)</b> | <b>Extended-Interval<br/>(N=53)</b> | <b>Cohort<br/>(N=835)</b> |
|------------------------------------------------------------|--------------------------------------|--------------------------------------------------------------|-------------------------------------------------|-------------------------------------|---------------------------|
| <b>Median Time-to-Treatment<br/>Discontinuation (days)</b> | 50                                   | 315                                                          | 127.5                                           | 168                                 | 133                       |
| <i>Total time on drug (days)</i>                           | 49                                   | 83                                                           | N/A                                             | N/A                                 | N/A                       |
| <i>Time on originally prescribed dose<br/>(days)</i>       |                                      |                                                              |                                                 |                                     |                           |

**eTable 3. Time-to-treatment discontinuation of standard- and extended-interval pembrolizumab in the All Diseases Cohort, by primary site of disease.**

| <b>Primary Site</b> | <b>Median TTD (D), Standard-Interval</b> | <b>Median TTD (D), Extended-Interval</b> |
|---------------------|------------------------------------------|------------------------------------------|
| Bladder             | 149                                      | 174.5                                    |
| Kidney              | 148                                      | 216                                      |
| Head and neck       | 129.5                                    | 104                                      |
| Melanoma            | 165                                      | 293                                      |
| Gastroesophageal    | 91                                       | 105.5                                    |
| Colorectal          | 154                                      | 216                                      |
| Hepatocellular      | 148                                      | 84                                       |
| Ureteral            | 136                                      | 154                                      |

**eTable 4. Incident prescriptions for levothyroxine and prednisone in the All Diseases Cohort.**

|                                                     | <b>Standard-Interval</b> | <b>Extended-Interval</b> | <b>Cohort</b> |
|-----------------------------------------------------|--------------------------|--------------------------|---------------|
| Patients with New Levothyroxine Prescription (n, %) | 84 (12.4%)               | 22 (13.8%)               | 106 (12.7%)   |
| Patients with New Prednisone Prescription (n, %)    | 142 (21.0%)              | 32 (20.1%)               | 174 (20.8%)   |

**eTable 5. Frequency of response assessment imaging ordering in the All Diseases Cohort.** Abbreviations: CT, computed tomography; MRI, magnetic resonance imaging; PET, positron emission tomography.

|                                    | <b>Standard-Interval</b> | <b>Extended-Interval</b> | <b>Cohort</b> |
|------------------------------------|--------------------------|--------------------------|---------------|
| # CT per Patient (mean +/- stdev)  | 2.02 (2.04)              | 1.82 (2.02)              | 1.99 (2.04)   |
| # MRI per Patient (mean +/- stdev) | 0.34 (0.83)              | 0.48 (0.96)              | 0.37 (0.86)   |
| # PET per Patient (mean +/- stdev) | 0.79 (1.36)              | 0.96 (1.30)              | 0.83 (1.35)   |

**eTable 6. Time-to-treatment discontinuation of standard- and extended-interval pembrolizumab in the NSCLC cohort.**

|                                                            | <b>Standard-Interval<br/>(N=151)</b> | <b>Standard-Interval →<br/>Extended-Interval<br/>(N=30)</b> | <b>Pooled<br/>Standard-Interval<br/>(N=181)</b> | <b>Extended-Interval<br/>(N=53)</b> | <b>Cohort<br/>(N=234)</b> |
|------------------------------------------------------------|--------------------------------------|-------------------------------------------------------------|-------------------------------------------------|-------------------------------------|---------------------------|
| <b>Median Time-to-Treatment<br/>Discontinuation (days)</b> | 71                                   | 332                                                         | 112                                             | 170                                 | 126                       |
| <i>Total time on drug (days)</i>                           | N/A                                  | 63                                                          | N/A                                             | N/A                                 | N/A                       |
| <i>Time on originally prescribed dose<br/>(days)</i>       |                                      |                                                             |                                                 |                                     |                           |

**eTable 7. Incident prescriptions for levothyroxine and prednisone in the NSCLC Cohort.**

|                                                     | <b>Standard-Interval</b> | <b>Extended-Interval</b> | <b>Cohort</b> |
|-----------------------------------------------------|--------------------------|--------------------------|---------------|
| Patients with New Levothyroxine Prescription (n, %) | 12 (6.6%)                | 5 (9.4%)                 | 17 (7.3%)     |
| Patients with New Prednisone Prescription (n, %)    | 37 (20.4%)               | 13 (24.5%)               | 50 (21.4%)    |

**eTable 8. Frequency of response assessment imaging ordering in the NSCLC Cohort.** Abbreviations: CT, computed tomography; MRI, magnetic resonance imaging; PET, positron emission tomography.

|                                    | <b>Standard-Interval</b> | <b>Extended-Interval</b> | <b>Cohort</b> |
|------------------------------------|--------------------------|--------------------------|---------------|
| # CT per Patient (mean +/- stdev)  | 1.91 (1.91)              | 1.74 (1.73)              | 1.87 (1.87)   |
| # MRI per Patient (mean +/- stdev) | 0.36 (0.73)              | 0.72 (1.25)              | 0.44 (0.88)   |
| # PET per Patient (mean +/- stdev) | 0.71 (1.23)              | 0.91 (1.29)              | 0.75 (1.24)   |



## eReferences

1. Charlson ME, Pompei P, Ales KL, MacKenzie CR. A new method of classifying prognostic comorbidity in longitudinal studies: development and validation. *J Chronic Dis*. 1987;40(5):373-383.
2. Goldstein DA, Ratain MJ, Saltz LB. Weight-Based Dosing of Pembrolizumab Every 6 Weeks in the Time of COVID-19. *JAMA Oncol*. 2020.
3. Administration USFaD. Review Memo -- Supplemental Biologics License Application 125514. In. Silver Spring, MD, USA2020.
4. Blumenthal GM, Gong Y, Kehl K, et al. Analysis of time-to-treatment discontinuation of targeted therapy, immunotherapy, and chemotherapy in clinical trials of patients with non-small-cell lung cancer. *Ann Oncol*. 2019;30(5):830-838.
5. Health CAfDaTi. CADTH technology review: optimal use 360 report: dosing and timing of immuno-oncology drugs. <https://www.cadth.ca/sites/default/files/ou-tr/ho0008-dosing-timing-immuno-oncology-drugs.pdf>. Published 2019. Updated November 2019. Accessed June 15, 2022.
6. Schneeweiss S, Rassen JA, Brown JS, et al. Graphical Depiction of Longitudinal Study Designs in Health Care Databases. *Ann Intern Med*. 2019;170(6):398-406.
